# Supplementary material for: Identification of different ALK mutations in a pair of neuroblastoma cell lines established at diagnosis and relapse
Source: PubMed Central journal article supplement (PMC5349989; doi:10.18632/oncotarget.13541), 2016-11-24
Supplement: oncotarget-07-87301-s001.pdf [file oncotarget-07-87301-s001.pdf]

## Identification of different *ALK* mutations in a pair of neuroblastoma cell lines established at diagnosis and relapse

### SUPPLEMENTARY FIGURES

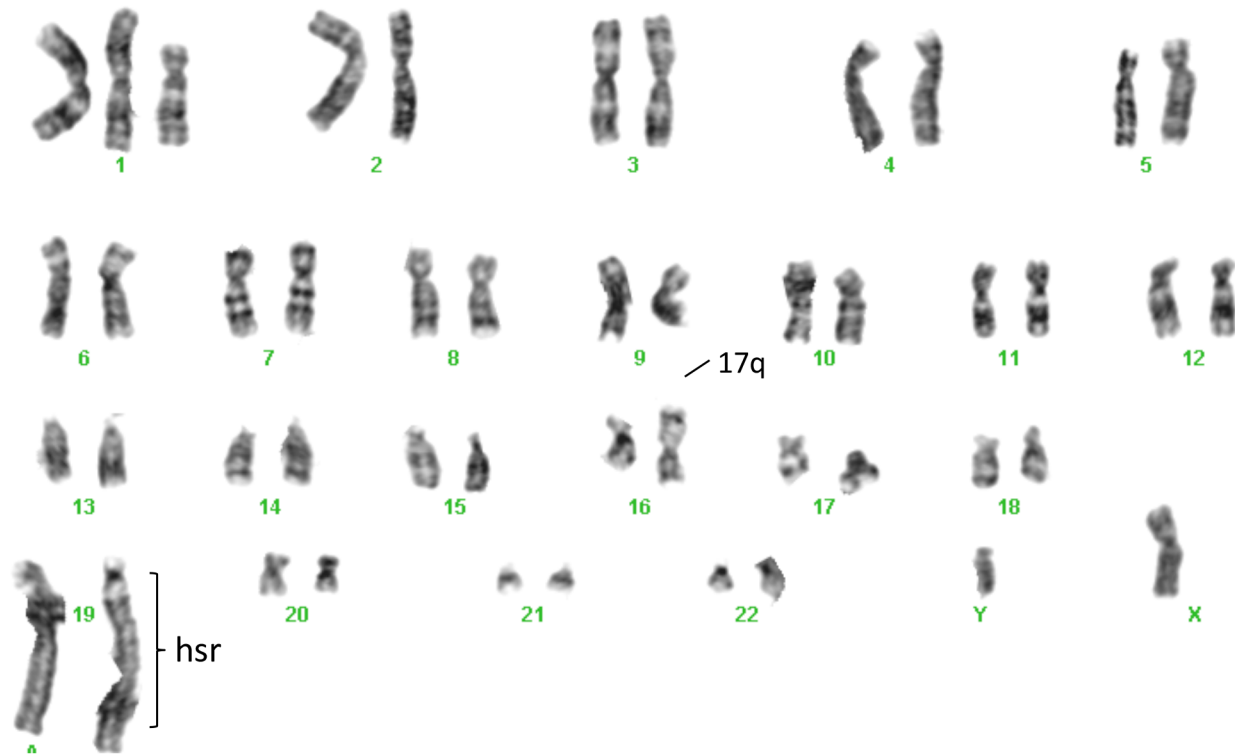

47,XY,del(1)(p22),+1,der(16)t(16;17)(p13;q12), hsr(19)(q13)x2

Supplementary Figure S1: Cytogenetic G-banding analysis of the karyotype of NBLW cell line using previously described methods (Tweddle et al, Cancer Res. 2001 Jan 1;61(1):8-13.).

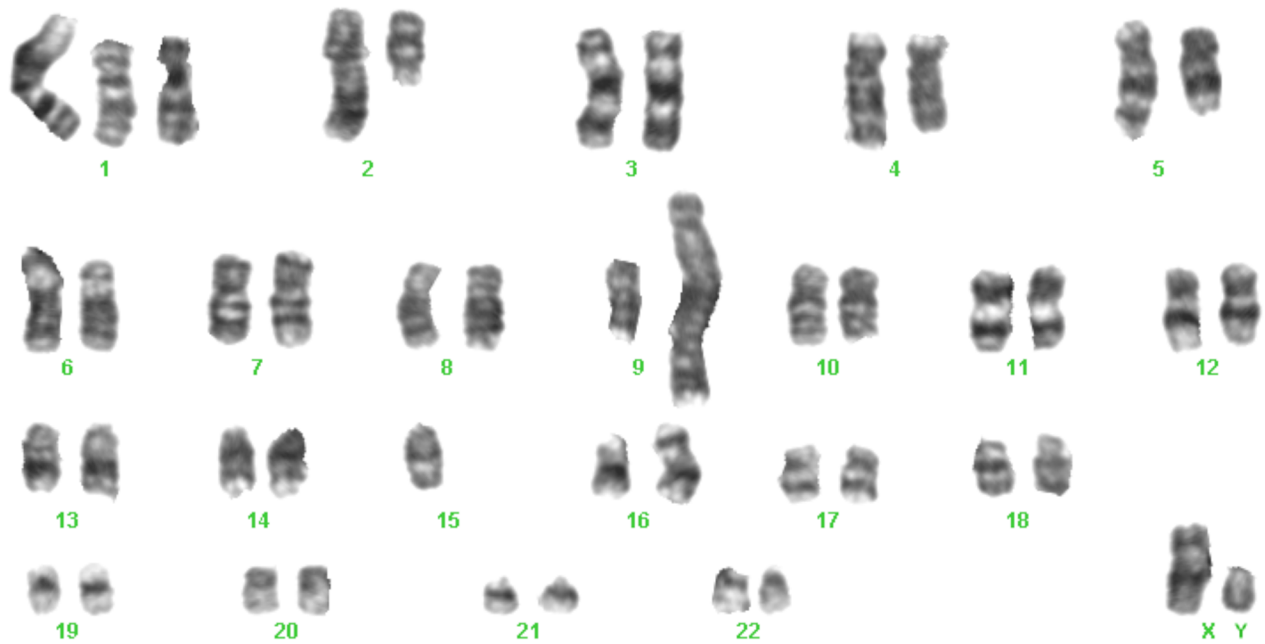

47,XY,del(1)(p22)x2,+1,del(2)(q13),del(4)(q2?q2?),del(5)(q33),  
?del(6)(q?),hsr(9)(q?),der(16)t(16;17)(p13;q12)

Supplementary Figure S2: Cytogenetic G-banding analysis of the karyotype of NBLW-R cell line using previously described methods (Tweddle et al, Cancer Res. 2001 Jan 1;61(1):8-13.).

**NBLW**

HSRs not in chromosome 9

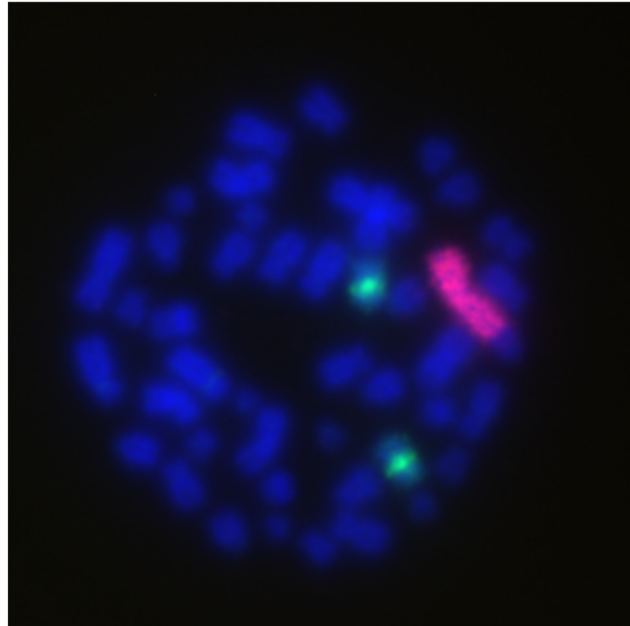

**NBLW-R**

HSRs in chromosome 9

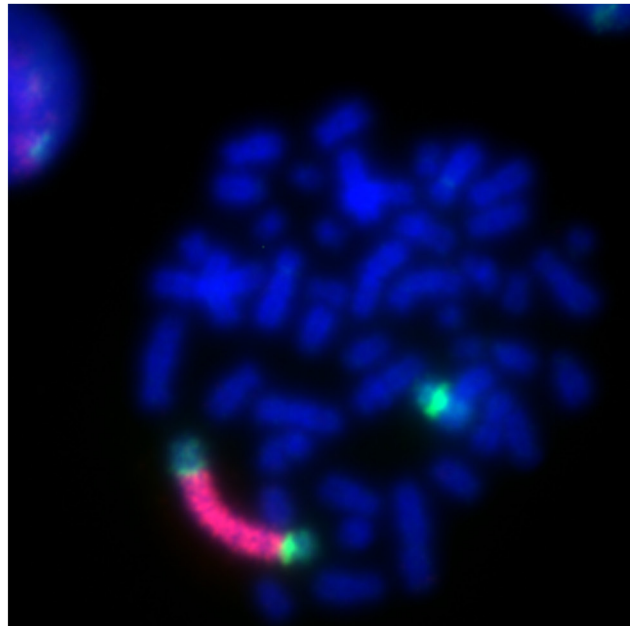

Supplementary Figure S3: Fluorescence *in situ* hybridisation using the MYCN probe (Red; Vysis) and chromosome 9 whole chromosome paint (green; Vysis) with previously described methods (Tweddle et al, Cancer Res. 2001 Jan 1;61(1):8-13.) confirms location of MYCN homogeneously staining regions (HSRs).

A)

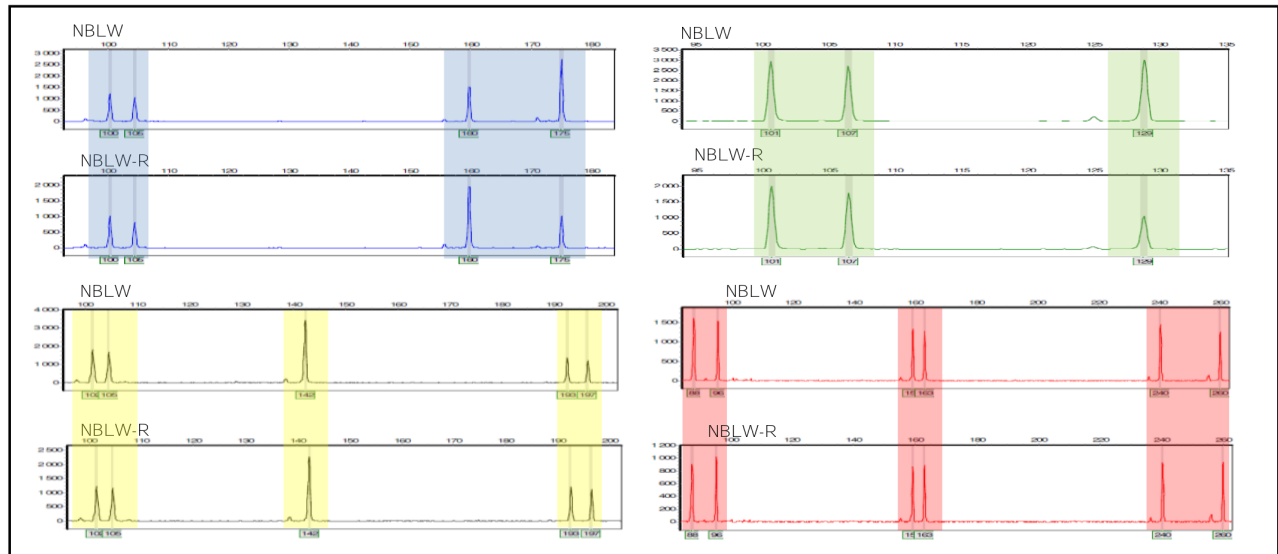

B)

| Loci       | Cell Line |         |
|------------|-----------|---------|
|            | NBLW      | NBLW-R  |
| Amelogenin | X – Y     | X – Y   |
| D3S1358    | 14 – 16   | 14 – 16 |
| TH01       | 7 – 8     | 7 – 8   |
| D21S11     | 28 – 30   | 28 – 30 |
| D18S51     | 14 – 14   | 14 – 14 |
| PentaE     | 13 – 14   | 13 – 14 |
| D5S818     | 13 – 14   | 13 – 13 |
| D13S317    | 8 – 11    | 8 – 11  |
| D7S820     | 11 – 12   | 11 – 12 |
| D16S539    | 11 – 12   | 11 – 12 |
| CSF1PO     | 12 – 12   | 12 – 12 |
| PentaD     | 13 – 13   | 13 – 13 |
| vWA        | 16 – 17   | 16 – 17 |
| D8S1179    | 14 – 14   | 14 – 14 |
| TPOX       | 8 – 10    | 8 – 10  |
| FGA        | 22 – 24   | 22 – 23 |

**Supplementary Figure S4: Independent STR genotyping of NBLW and NBLW-R cells compared using A.** Applied Biosystems AuthenticFiler™ PCR Amplification Kit and **B.** Promega PowerPlex® 16 HS System and confirmed that both cell lines were established from the same patient.
